# Supplementary material
Source: Springer Nature journal article supplement (https://www.springermedizin.de/resource/supplementary/12885_2012_3840_MOESM8_ESM.pdf/9464596)

**A**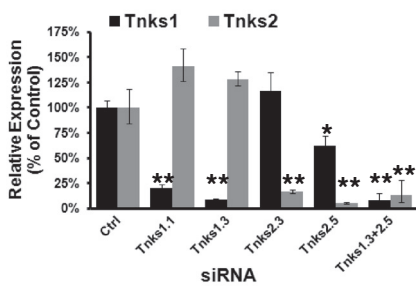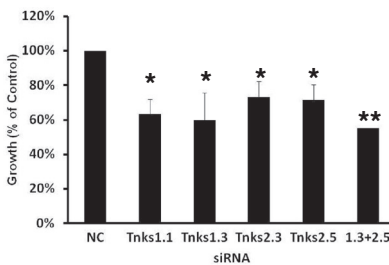**B**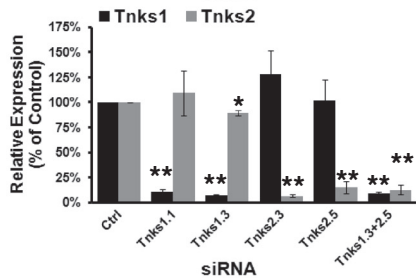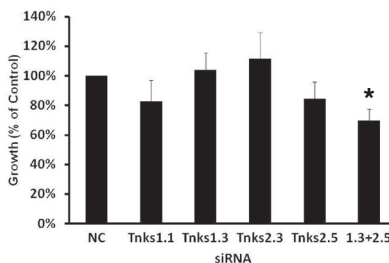**C**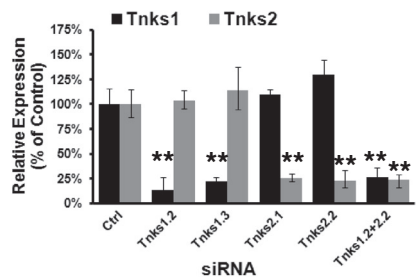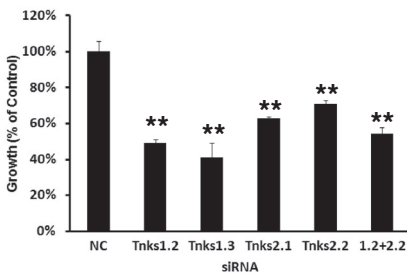**D**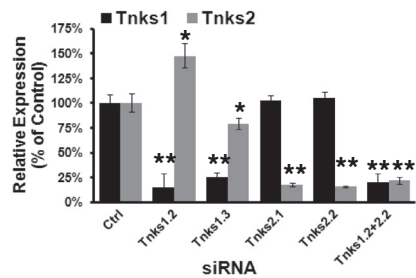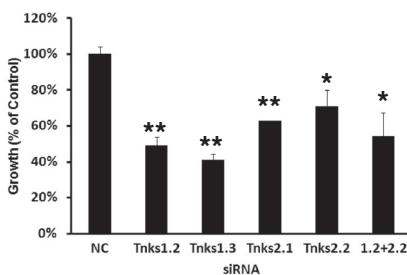

Supplement: MOESM8 [file 9464596]
